# Supplementary material for: International Analysis of the Nutritional Content and a Review of Health Benefits of Non-Dairy Plant-Based Beverages
Source: PubMed Central journal article supplement (PMC7999853; doi:10.3390/nu13030842), 2021-03-04
Supplement: nutrients-13-00842-s001.pdf [file nutrients-13-00842-s001.pdf]

Table S1. Median (Q1-Q3) values<sup>1</sup> of selected micronutrients used in fortification for all non-dairy beverages (both fortified and non-fortified), by world region.

|             | <b>Combined 3 regions</b> | <b>USA</b>                | <b>Australia</b>        | <b>Europe</b>          |         |
|-------------|---------------------------|---------------------------|-------------------------|------------------------|---------|
| n           | 148                       | 60                        | 48                      | 40                     | p value |
| Calcium     | 25 (7-35)                 | 25 (10-35)                | 37 (13-38) <sup>a</sup> | 22 (0-30) <sup>a</sup> | <0.001  |
| Vitamin D   | 8.5 (0-15)                | 15 (10-25) <sup>a,b</sup> | 0 (0-0) <sup>a</sup>    | 3 (0-9) <sup>b</sup>   | <0.001  |
| Vitamin B12 | 0 (0-38)                  | 0 (0-50)                  | 0 (0-50)                | 0 (0-24)               | 0.234   |

<sup>1</sup> Values given as % daily value per serving (240ml for USA; 250ml for Australia and Europe).

Kruskal–Wallis non-parametric test for independent samples with multiple pairwise comparisons were used to perform comparisons among regions. Different lowercase letters in the same row indicate significant differences among regions, after Bonferroni adjustment for multiple comparisons. P<0.05 is considered statistically significant.

Table S2. Median (Q1-Q3) of calcium, vitamin D and vitamin B12 levels (%daily value) for all non-dairy beverages (both fortified and non-fortified) per serving, by type of beverage

| <b>All beverages</b>              |         |              |              |             |
|-----------------------------------|---------|--------------|--------------|-------------|
| <b>Type of beverage</b>           | n       | Calcium      | Vitamin D    | Vitamin B12 |
| Almond                            | 33      | 30 (2-37)    | 0 (0-10)     | 0 (0-0)     |
| Almond-coconut                    | 6       | 27.5 (0-35)  | 4.5 (0-25)   | 0 (0-38)    |
| Cashew                            | 7       | 10 (3-29.5)  | 9 (0-17.5)   | 0 (0-44)    |
| Coconut                           | 10      | 10 (4-30)    | 9.5 (0-12.5) | 27 (0-38)   |
| Hazelnut                          | 3       | 0 (0-11.5)   | 0 (0-4.5)    | 0 (0-19)    |
| Macadamia                         | 3       | 8 (4-21.5)   | 0 (0-10)     | 0 (0-120)   |
| Oats                              | 23      | 25 (20-35)   | 10 (0-17.5)  | 0 (0-31.5)  |
| Pea                               | 7       | 30 (24-39)   | 23 (11.5-25) | 25 (12-35)  |
| Rice                              | 13      | 25 (20-30)   | 0 (0-12.5)   | 0 (0-25)    |
| Soy                               | 29      | 30 (19-37)   | 9.5 (0-15)   | 44 (0-50)   |
| Legume + nuts/grains <sup>1</sup> | 6       | 27.5 (25-37) | 10 (0-25)    | 0 (0-50)    |
| Other beverages <sup>2</sup>      | 8       | 17.5 (0-25)  | 8 (0-17.5)   | 0 (0-0)     |
|                                   | p value | 0.185        | 0.735        | 0.075       |

<sup>1</sup> Pea+ oats; pea+almond+cashew; pea+almond (n=2); soy+rice; pea + flax

<sup>2</sup> Rice+hazelnut; rice+coconut; oats+walnut; quinoa (n=2); flax; hemp; walnut + almond + hazelnut

Serving size: 240ml for USA; 250ml for Australia and Europe. Kruskal–Wallis non-parametric test for independent samples with multiple pairwise comparisons were used to perform comparisons among regions. P<0.05 is considered statistically significant.
